# Supplementary material for: The explanation of abnormal thermal quenching of the charge transfer band based on thermally coupled levels and applications as temperature sensing probes
Source: Royal Society of Chemistry journal article supplement (doi:10.1039/d2dt02744e), 2022-01-01
Supplement: d2dt02744e1.pdf [file d2dt02744e1.pdf]

Electronic Supplementary Information for

**The explanation of abnormal thermal quenching of charge transfer band based on thermally coupled levels and the applications as temperature sensing probes**

*Junbei Wang<sup>1</sup>, Xianju Zhou<sup>1\*</sup>, Guotao Xiang<sup>1</sup>, Sha Jiang<sup>1</sup>, Li Li<sup>1</sup>, Yongjie Wang<sup>1</sup>, Chuan Jing<sup>1</sup>, Hongmei Yang<sup>1</sup>, Yanhao Huang<sup>2</sup>, Feng Wang<sup>2\*</sup>*

<sup>1</sup>School of Science, Chongqing University of Posts and Telecommunications, Chongqing, 400065, P. R. China

<sup>2</sup>School of Materials Science and Engineering, Chongqing Jiaotong University, Chongqing, 400065, P. R. China

**Figure S1.** X-ray diffraction pattern of (a)  $\text{CaMoO}_4: 5\%\text{Eu}^{3+}$ , (b)  $\text{CaWO}_4, \text{CaWO}_4: 5\%\text{Eu}^{3+}$ , (c)  $\text{LuVO}_4$  and  $\text{LuVO}_4: 5\%\text{Eu}^{3+}$  and (d)  $\text{NaGdF}_4: 5\%\text{Er}^{3+}$ .

**Figure S2.** Excitation ( $\lambda_{\text{em}}=553$  nm) and emission ( $\lambda_{\text{ex}}=300$  nm) spectra of  $\text{CaMoO}_4: 5\%\text{Er}^{3+}$ .

**Figure S3.** Temperature-dependent excitation spectra of  $\text{NaGdF}_4: 5\%\text{Er}^{3+}$  nanoparticles by monitoring at (a) 521 and (b) 540 nm in the 310-560 K range. (c) The integral intensity of  $^4\text{I}_{15/2} \rightarrow ^4\text{G}_{11/2}$  transition.

**Figure S4.** Temperature-dependent excitation spectra of  $\text{CaWO}_4: 5\%\text{Er}^{3+}$  by monitoring at (a) 521 and (b) 553 nm in the 328-553 K range. (c) Relative integral intensities of CTB. (d) Variation in FWHM of CTB.

**Figure S5.** Temperature-dependent excitation spectra of  $\text{LuVO}_4: 5\%\text{Er}^{3+}$  by monitoring at (a) 526 and (b) 554 nm in the 303-603 K range. (c) Relative integral intensities of CTB. (d) Variation in FWHM of CTB.

**Figure S6.** Temperature-dependent excitation and emission spectra of (a)  $\text{CaMoO}_4$ , (b)  $\text{CaWO}_4$  and (c)  $\text{LuVO}_4$ .

**Figure S7.** The original excitation spectra of  $\text{CaWO}_4: 5\%\text{Eu}^{3+}$ . The excitation of CTB is weak when compared with that of f-f transitions of  $\text{Eu}^{3+}$ .

**Figure S8.** Temperature-dependent emission ( $\lambda_{\text{ex}}=327$  nm) spectra of  $\text{LuVO}_4: 5\%\text{Er}^{3+}$  inorganic phosphors in the 303-603 K range.

**Figure S9.** Temperature-dependent emission ( $\lambda_{\text{ex}}=325$  nm) spectra of  $\text{LuVO}_4: 5\%\text{Eu}^{3+}$  inorganic phosphors in the 328-553 K range.

**Figure S10.** Comparison of the diffuse reflectance spectra of the six samples at room temperature.

**Figure S11.** (a) Scatter plots of  $I_{520-534}$  and  $I_{542-554}$  with temperature in the temperature-

dependent emission ( $\lambda_{\text{ex}}=300$  nm) spectra of  $\text{CaMoO}_4: 5\%\text{Er}^{3+}$  inorganic phosphors. (b) Temperature-dependent emission intensity ratio ( $I_{520-534}/I_{542-554}$ ) and fitted curves. (c) Relative sensitivity  $S_r$ .

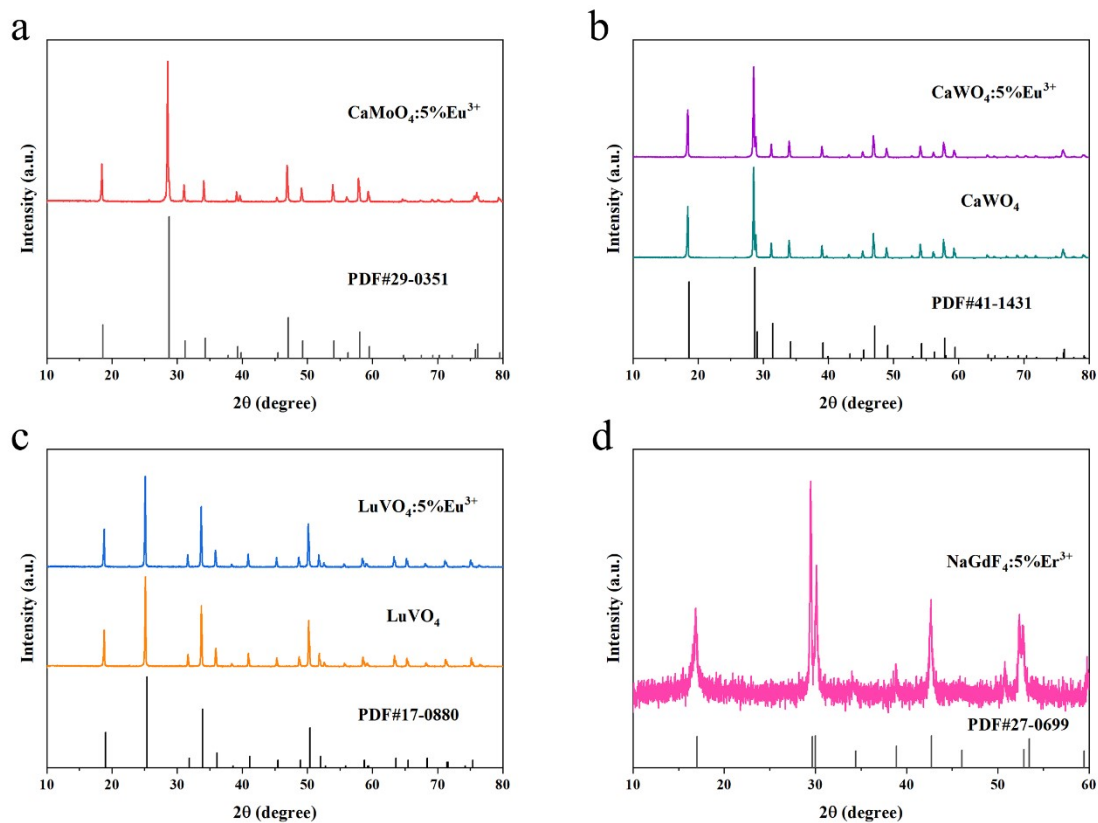

Figure S1. X-ray diffraction pattern of (a)CaMoO<sub>4</sub>: 5%Eu<sup>3+</sup>, (b) CaWO<sub>4</sub>, CaWO<sub>4</sub>: 5%Eu<sup>3+</sup>, (c) LuVO<sub>4</sub> and LuVO<sub>4</sub>: 5%Eu<sup>3+</sup> and (d) NaGdF<sub>4</sub>: 5%Er<sup>3+</sup>.

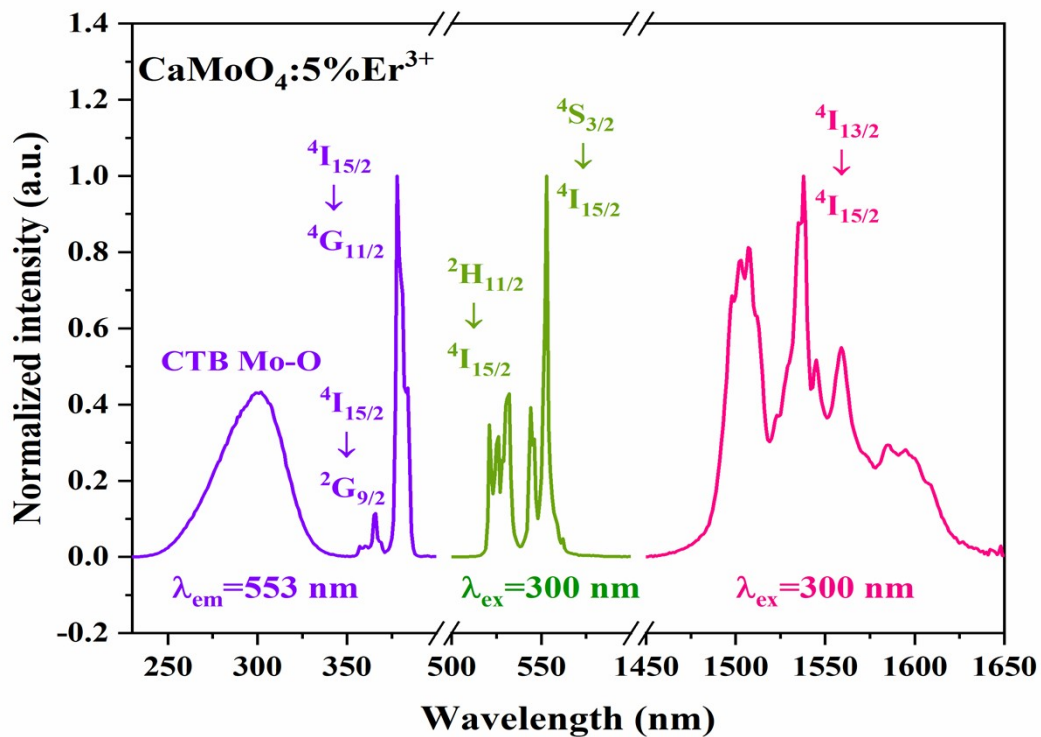

Fig. S2 Excitation ( $\lambda_{em}=553$  nm) and emission ( $\lambda_{ex}=300$  nm) spectra of CaMoO<sub>4</sub>: 5%Er<sup>3+</sup>.

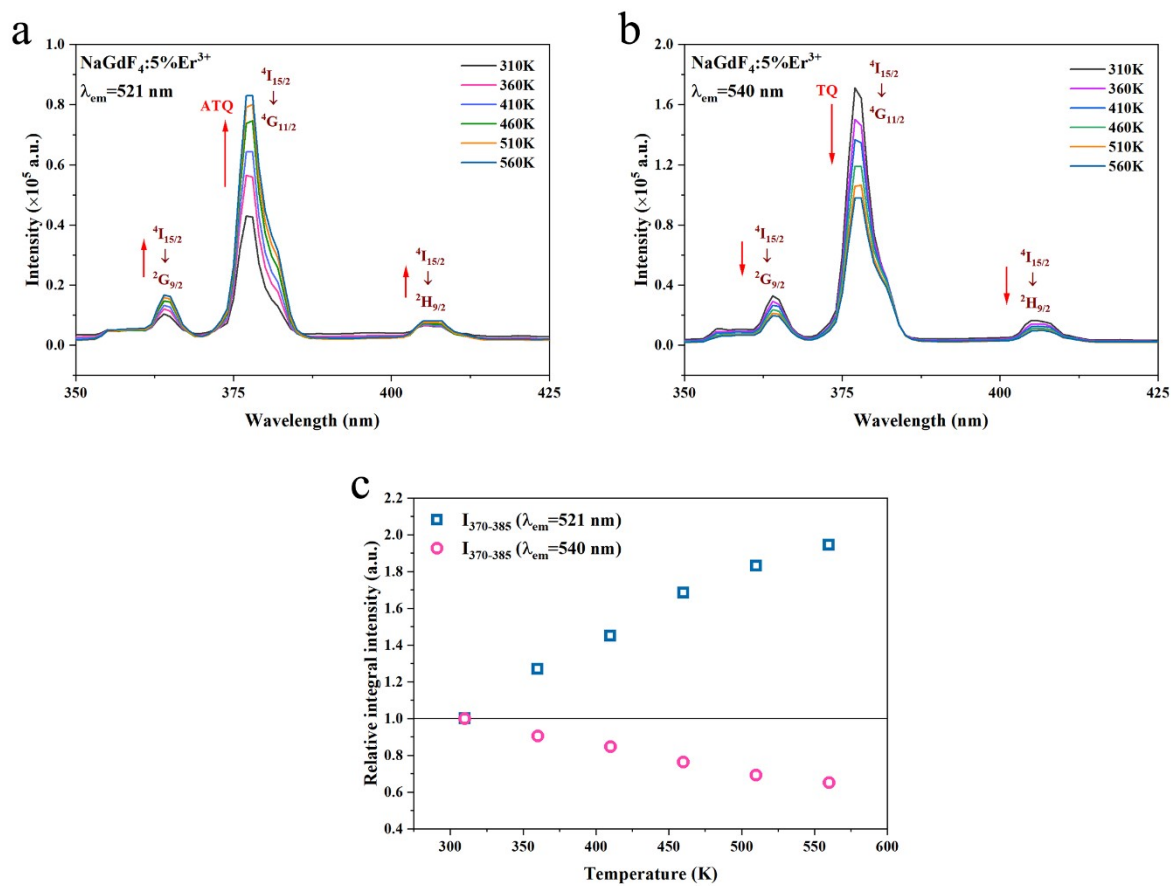

Figure S3. Temperature-dependent excitation spectra of NaGdF<sub>4</sub>: 5%Er<sup>3+</sup> nanoparticles by monitoring at (a) 521 and (b)

540 nm in the 310-560 K range. (c) The integral intensity of <sup>4</sup>I<sub>15/2</sub> → <sup>4</sup>G<sub>11/2</sub> transition.

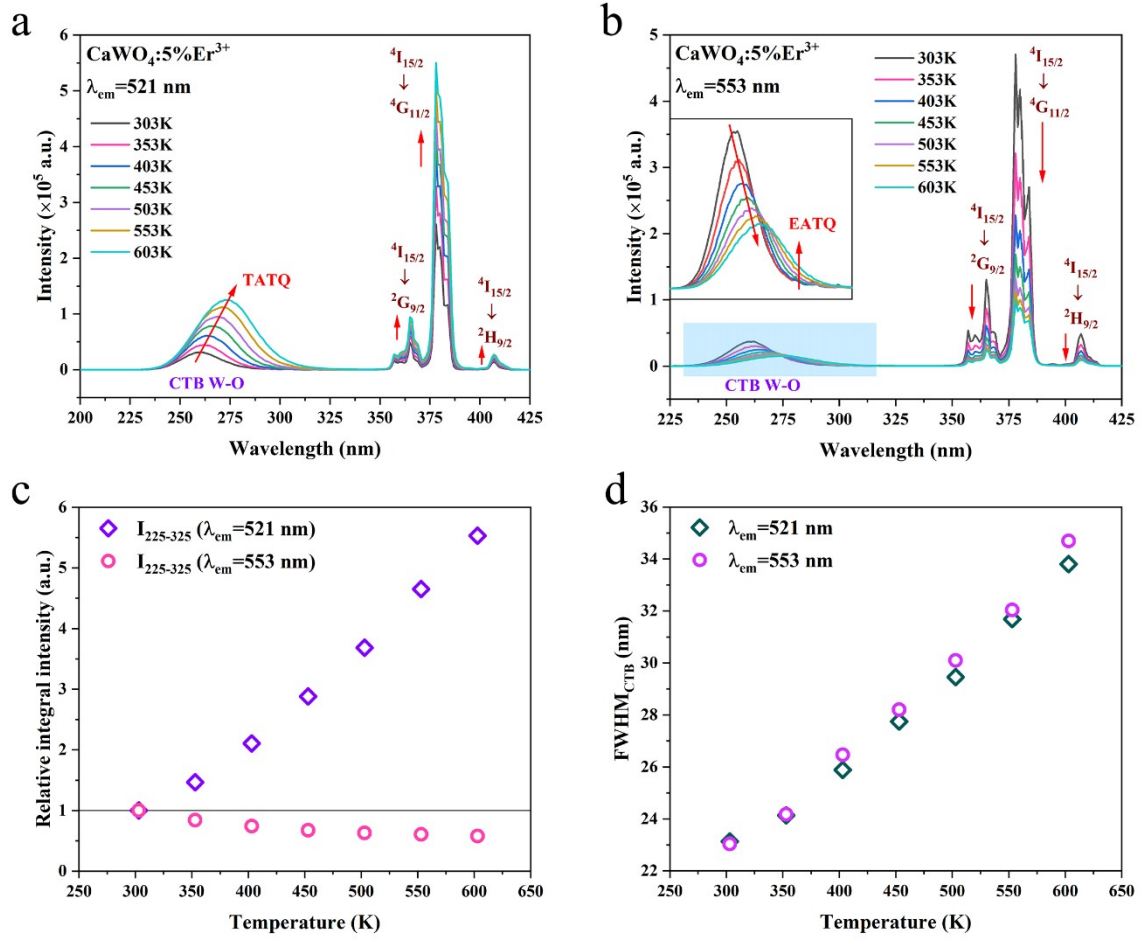

**Figure S4.** Temperature-dependent excitation spectra of  $\text{CaWO}_4:5\%\text{Er}^{3+}$  by monitoring at (a) 521 and (b) 553 nm in the 328-553 K range. (c) Relative integral intensities of CTB. (d) Variation in FWHM of CTB.

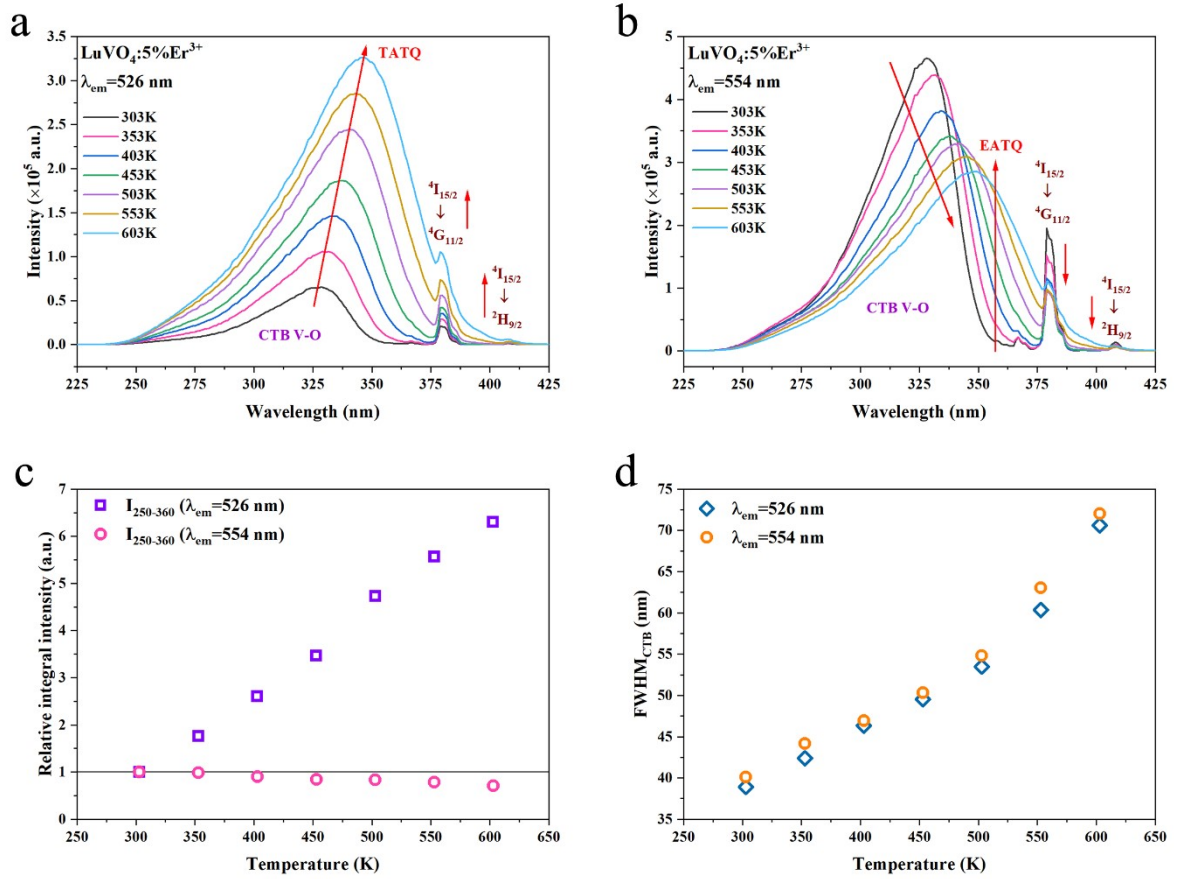

**Figure S5.** Temperature-dependent excitation spectra of LuVO<sub>4</sub>: 5%Er<sup>3+</sup> by monitoring at (a) 526 and (b) 554 nm in the 303-603 K range. (c) Relative integral intensities of CTB. (d) Variation in FWHM of CTB.

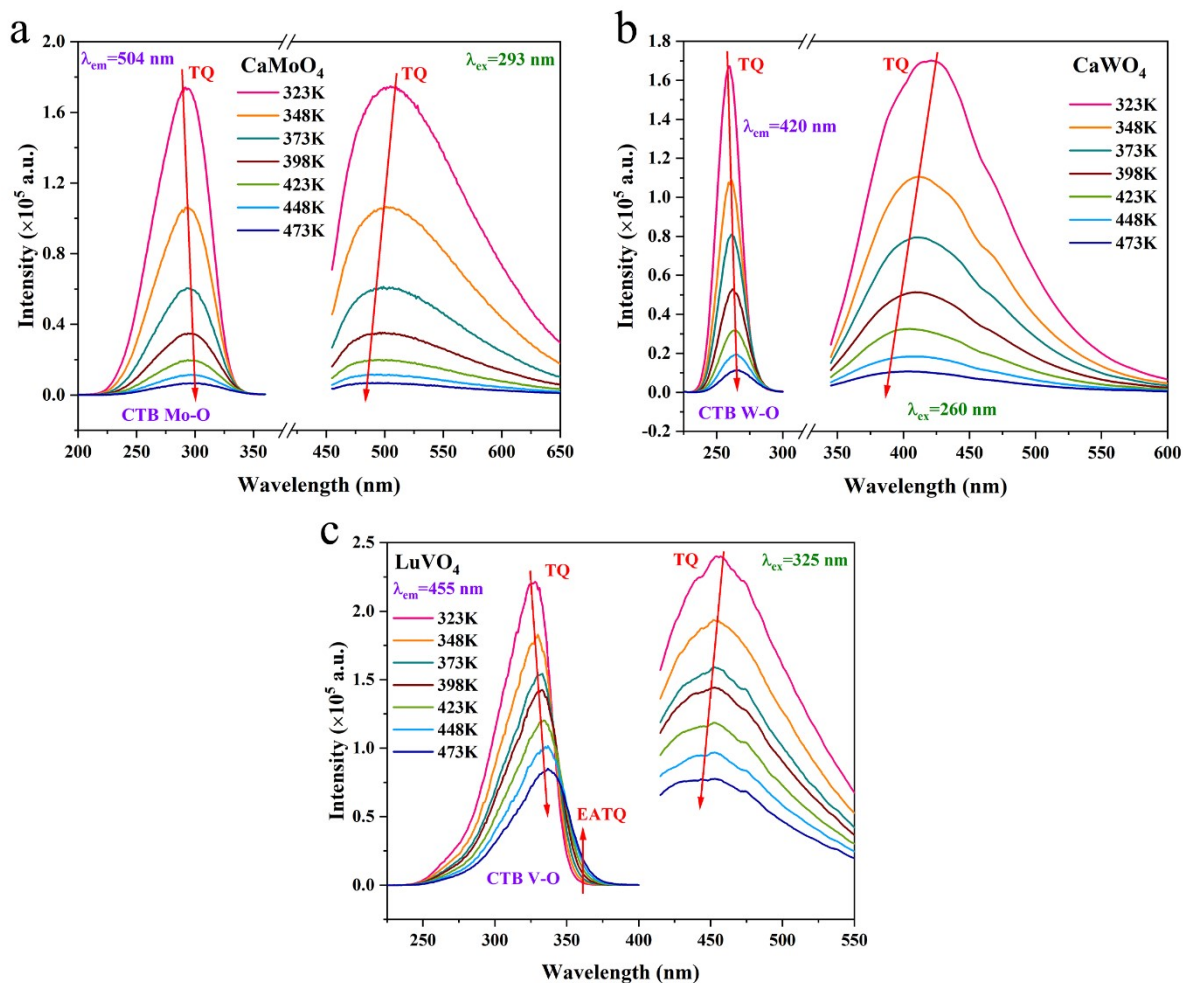

Figure S6. Temperature-dependent excitation and emission spectra of (a)  $\text{CaMoO}_4$ , (b)  $\text{CaWO}_4$  and (c)  $\text{LuVO}_4$ .

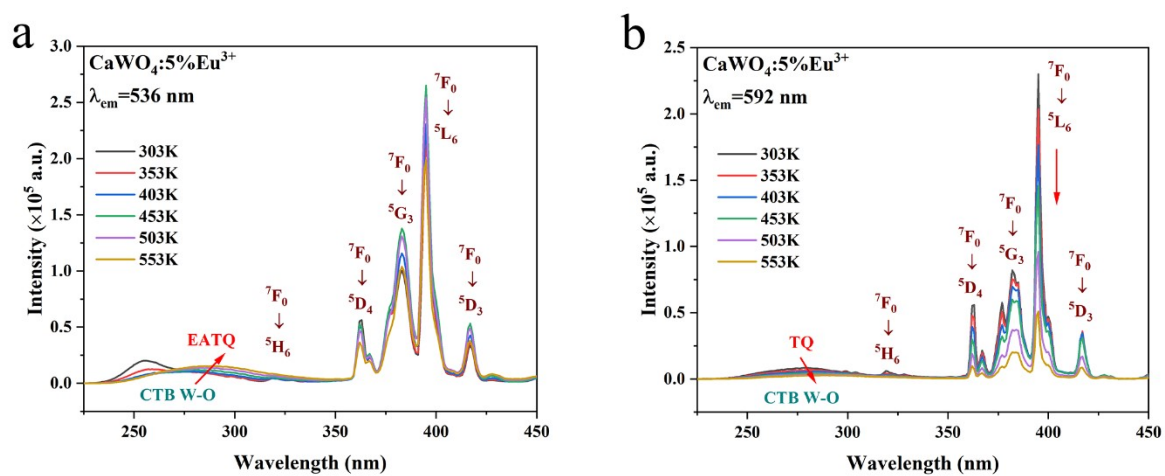

Figure S7. The original excitation spectra of  $\text{CaWO}_4:5\%\text{Eu}^{3+}$ . The excitation of CTB is weak when compared with that of f-f transitions of  $\text{Eu}^{3+}$ .



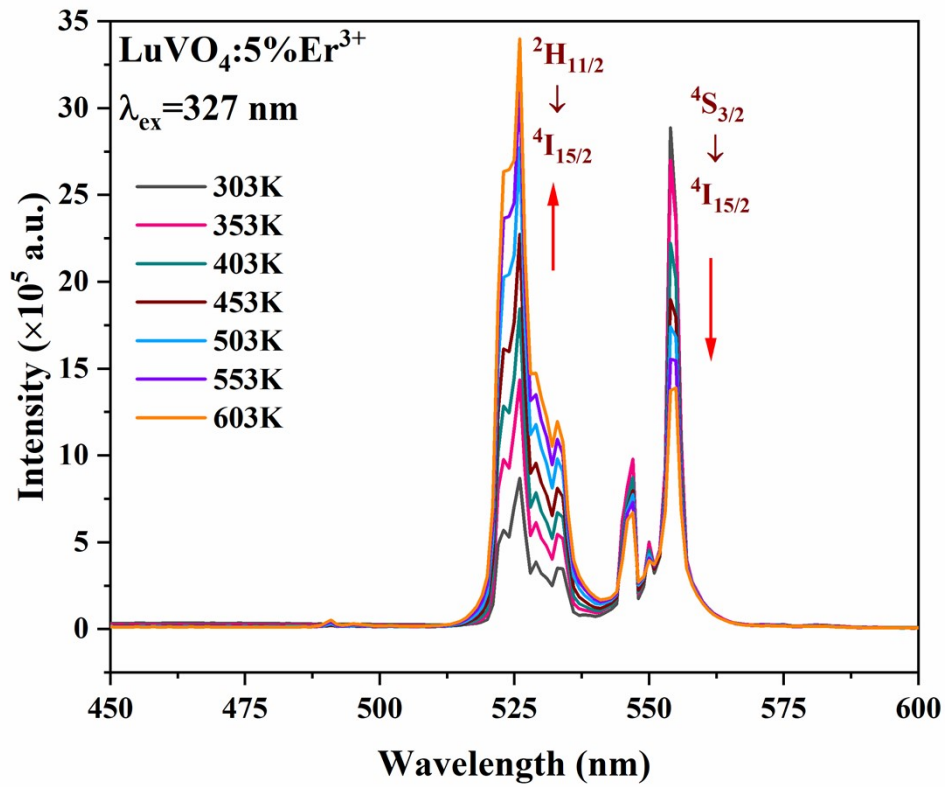

Figure S8. Temperature-dependent emission ( $\lambda_{\text{ex}}=327 \text{ nm}$ ) spectra of LuVO<sub>4</sub>: 5%Er<sup>3+</sup> inorganic phosphors in the 303-603 K range.

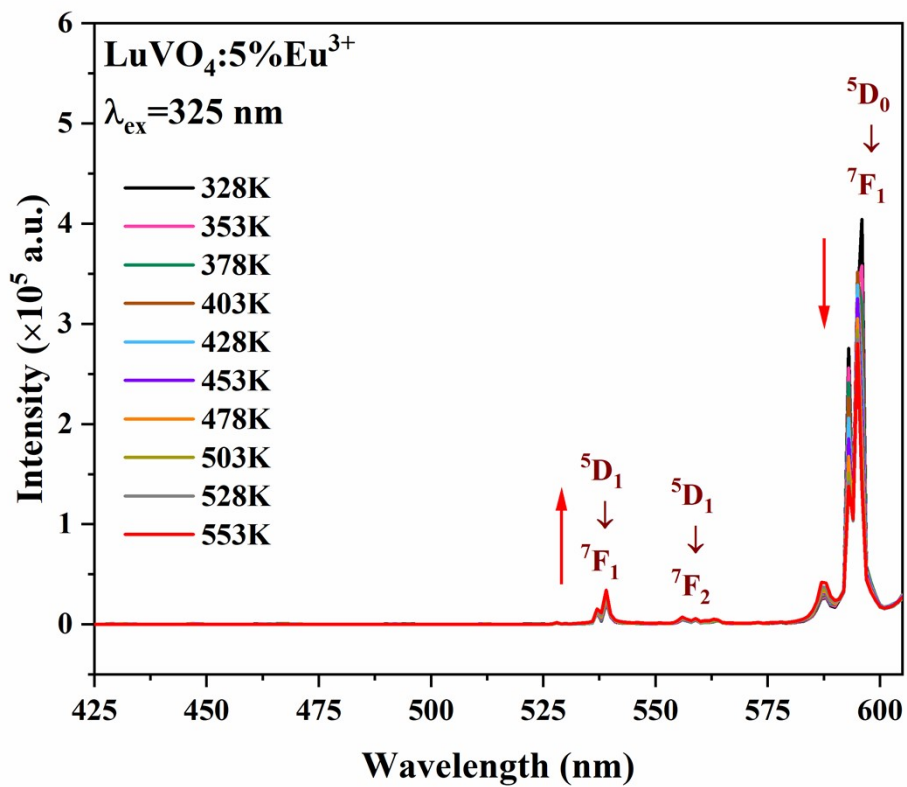

**Figure S9.** Temperature-dependent emission ( $\lambda_{\text{ex}}=325$  nm) spectra of  $\text{LuVO}_4: 5\% \text{Eu}^{3+}$  inorganic phosphors in the 328-553 K range.

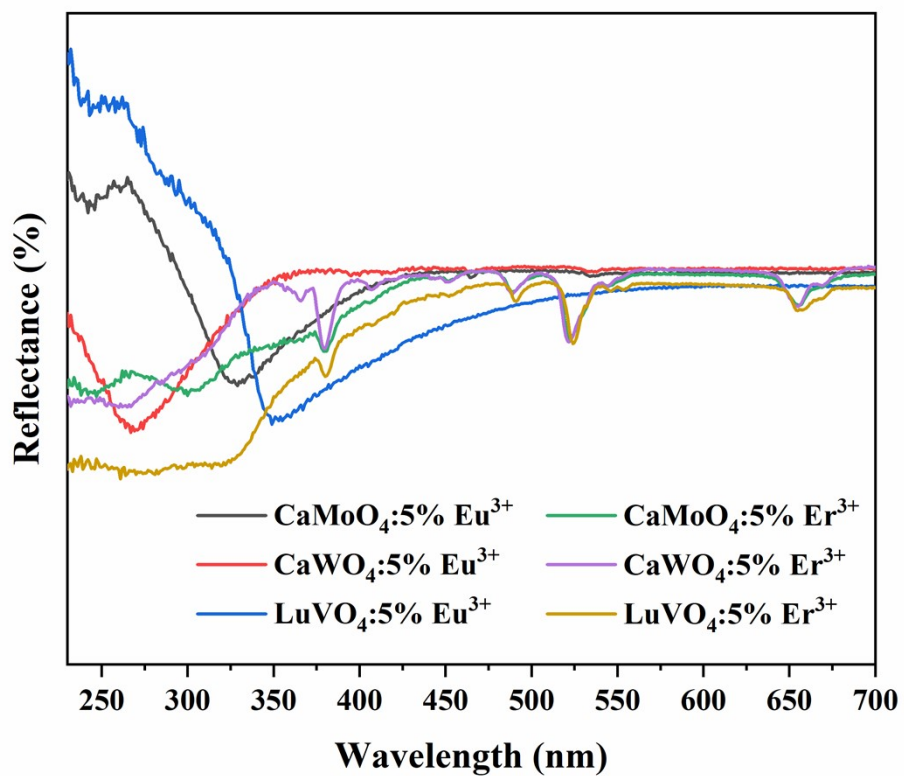

**Figure S10.** Comparison of the diffuse reflectance spectra of the six samples at room temperature.

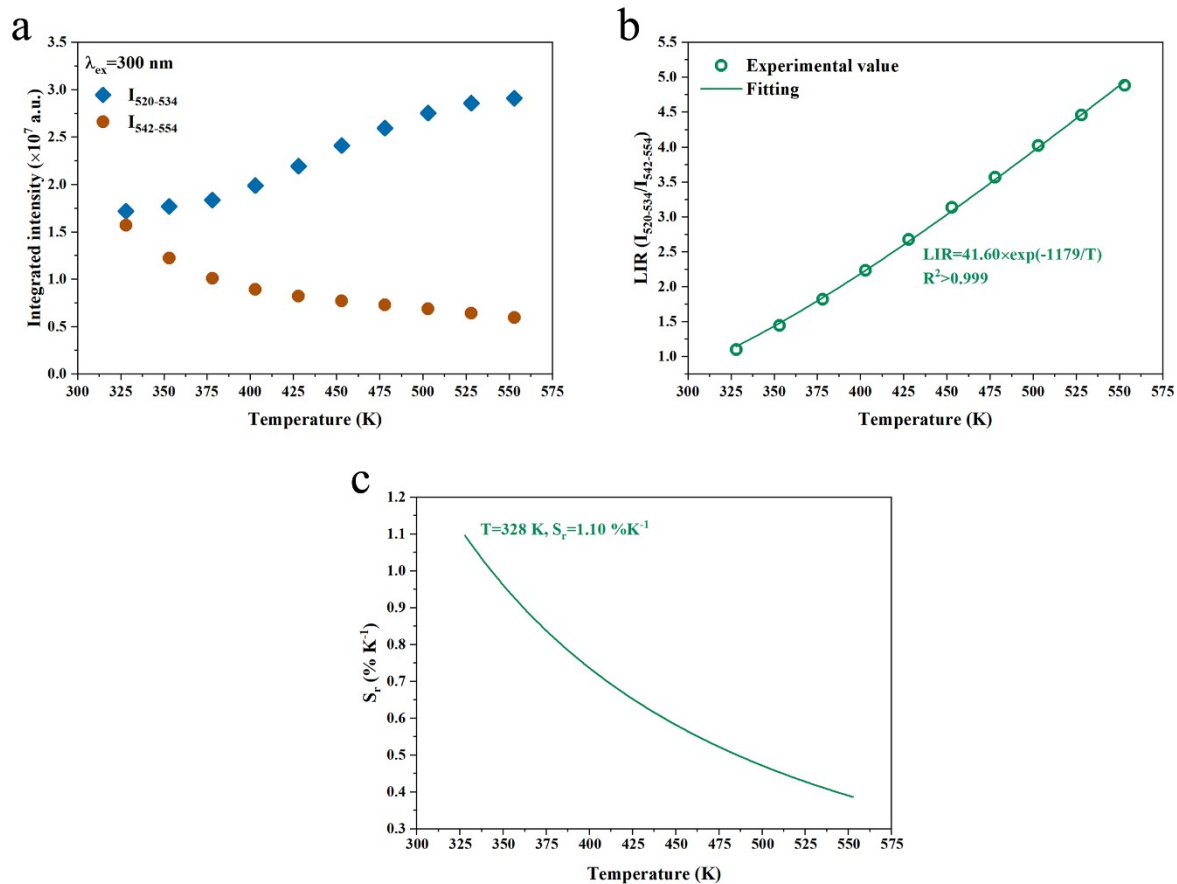

**Figure S11.** (a) Scatter plots of  $I_{520-534}$  and  $I_{542-554}$  with temperature in the temperature-dependent emission ( $\lambda_{\text{ex}}=300$  nm) spectra of  $\text{CaMoO}_4: 5\% \text{Er}^{3+}$  inorganic phosphors. (b) Temperature-dependent emission intensity ratio ( $I_{520-534}/I_{542-554}$ ) and fitted curves. (c) Relative sensitivity  $S_r$ .
